# Supplementary material for: MRI-Derived Tumour-to-Breast Volume Is Associated with the Extent of Breast Surgery
Source: MDPI journal article supplement (doi:10.3390/diagnostics11020204), 2021-01-30
Supplement: s1 [file s1]

**Table S1.** Comparison of volume metrics obtained by applying both manual segmentation and region growing segmentation to the subset of 32 patients with 32 unifocal lesions.

|                                           | Patients who<br>Underwent Breast-<br>Conserving Surgery (23<br>patients) | Spearman's $\rho$ | Patients who<br>Underwent Mastectomy<br>(9 patients) | Spearman's $\rho$ |
|-------------------------------------------|--------------------------------------------------------------------------|-------------------|------------------------------------------------------|-------------------|
| Median MS-TBVR Reader 1 (IQR)             | 1.19‰<br>(0.49‰–2.57‰)                                                   | 0.986             | 4.11‰<br>(1.34‰–6.29‰)                               | 0.983             |
| Median RG-TBVR Reader 1 (IQR)             | 1.08‰<br>(0.51‰–2.60‰)                                                   |                   | 3.42‰<br>(1.20‰–6.55‰)                               |                   |
| Median MS-TBVR Reader 2 (IQR)             | 1.09‰<br>(0.49‰–2.94‰)                                                   | 0.984             | 3.97‰<br>(1.49‰–6.08‰)                               | 0.983             |
| Median RG-TBVR Reader 2 (IQR)             | 1.02‰<br>(0.50‰–2.40‰)                                                   |                   | 2.86‰<br>(1.11‰–6.03‰)                               |                   |
| Median MS-tumour volume Reader 1<br>(IQR) | 0.70 cm <sup>3</sup><br>(0.40–1.91 cm <sup>3</sup> )                     | 0.980             | 2.71 cm <sup>3</sup><br>(0.52–4.38 cm <sup>3</sup> ) | 0.967             |
| Median RG-tumour volume Reader 1<br>(IQR) | 0.74 cm <sup>3</sup><br>(0.31–1.67 cm <sup>3</sup> )                     |                   | 2.26 cm <sup>3</sup><br>(0.50–4.58 cm <sup>3</sup> ) |                   |
| Median MS-tumour volume Reader 2<br>(IQR) | 0.99 cm <sup>3</sup><br>(0.39–2.21 cm <sup>3</sup> )                     | 0.971             | 2.82 cm <sup>3</sup><br>(0.74–4.64 cm <sup>3</sup> ) | 0.983             |
| Median RG-tumour volume Reader 2<br>(IQR) | 0.74 cm <sup>3</sup><br>(0.33–1.57 cm <sup>3</sup> )                     |                   | 2.04 cm <sup>3</sup><br>(0.64–4.39 cm <sup>3</sup> ) |                   |

IQR, interquartile range; MS, manual segmentation; RG, region growing segmentation; TBVR, tumour-to-breast volume ratio.

**Table S2.** Comparison of segmentation times obtained by applying both manual segmentation and region growing segmentation to the subset of 32 patients with 32 unifocal lesions.

| Tumour Volume<br>Segmentation Time        | Reader 1            | Reader 2            | Wilcoxon Test $p$ Value |
|-------------------------------------------|---------------------|---------------------|-------------------------|
| Manual method (IQR)                       | 124 s<br>(86–158 s) | 138 s<br>(92–198 s) | 0.905                   |
| Region growing method<br>(IQR)            | 33 s<br>(25–46 s)   | 32 s<br>(25–49 s)   | 0.999                   |
| <b>Wilcoxon test <math>p</math> value</b> | <b>&lt; 0.001</b>   | <b>&lt; 0.001</b>   |                         |

IQR, interquartile range.

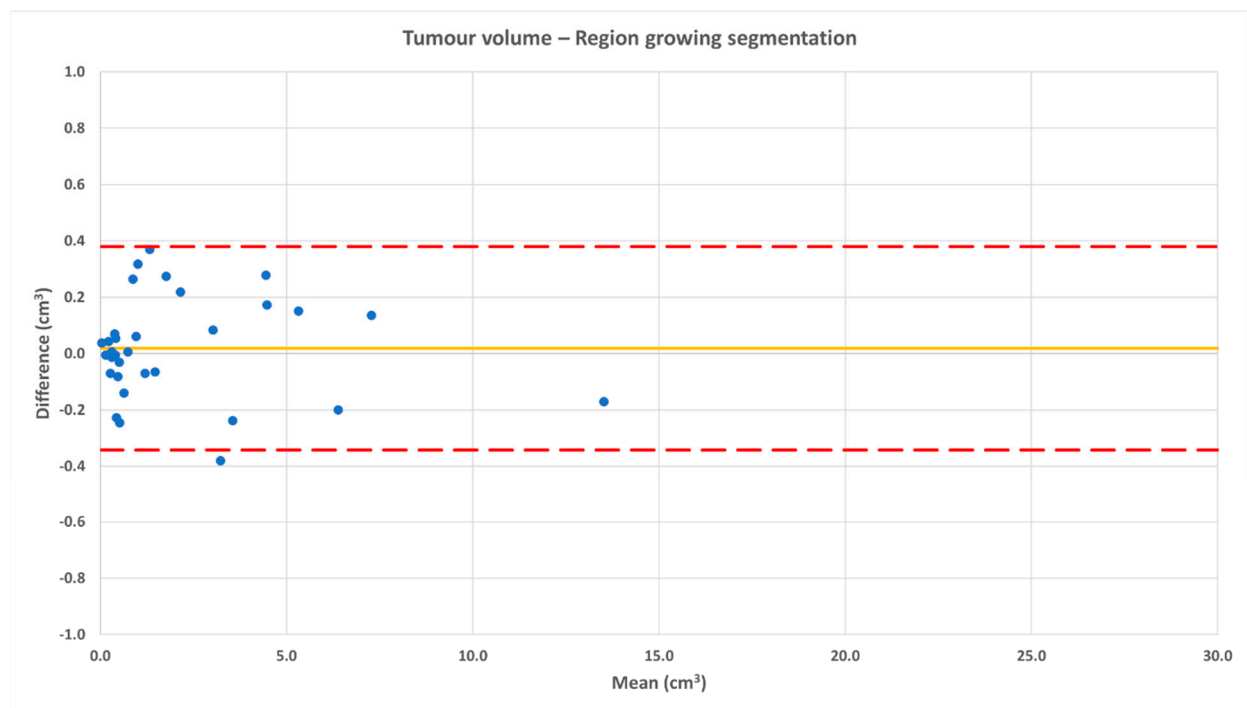

**Figure S1.** Bland–Altman plot for interobserver reproducibility of region growing segmentation of tumour volume. Coefficient of reproducibility: 0.36 cm<sup>3</sup>. Bias: 0.02 cm<sup>3</sup> bias. Reproducibility: 83%.

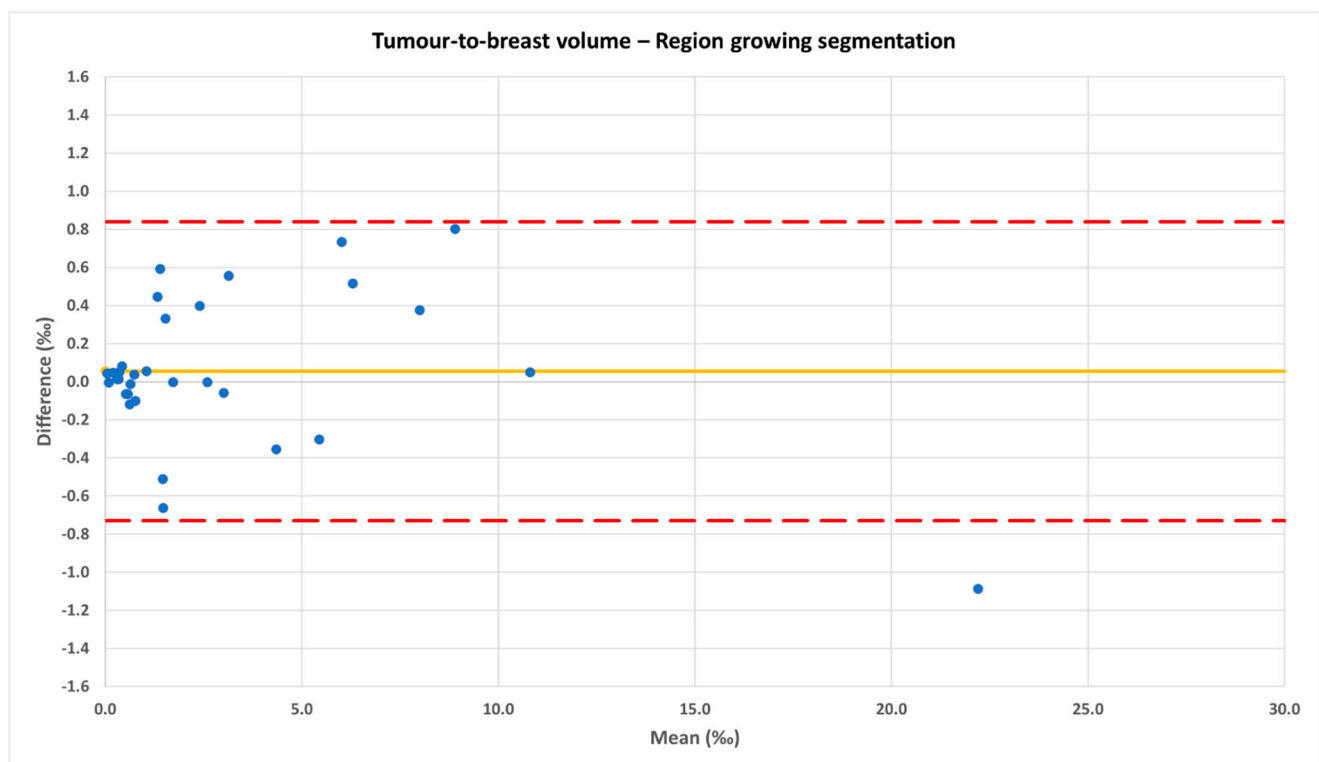

**Figure S2.** Bland–Altman plot for interobserver reproducibility of tumour-to-breast volume ratio obtained with region growing segmentation of tumour volume. Coefficient of reproducibility: 0.78 cm<sup>3</sup>. Bias: 0.06 cm<sup>3</sup> bias. Reproducibility: 75%.
